# Supplementary material
Source: Springer Nature journal article supplement (https://www.springermedizin.de/resource/supplementary/12890_2014_628_MOESM6_ESM.pdf/9505462)

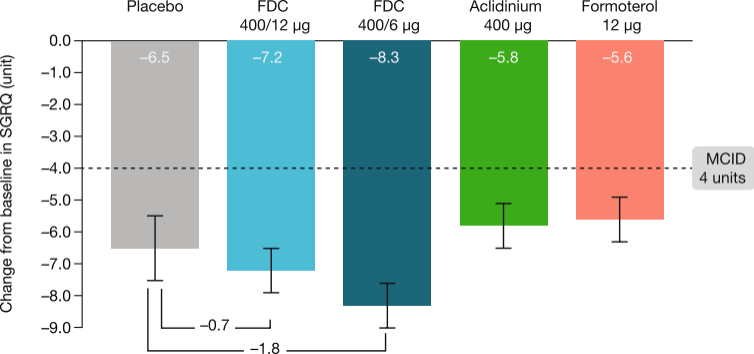

Supplement: MOESM6 [file 9505462]
